# Supplementary material for: Risks of Recurrent Cardiovascular Events and Mortality in 1-Year Survivors of Acute Myocardial Infarction Implanted with Newer-Generation Drug-Eluting Stents
Source: MDPI journal article supplement (doi:10.3390/jcm10163642), 2021-08-17
Supplement: s1 [file s1]

**Supplementary Table S1.** Medications prescribed to patients.

| Medication                         | Frequency   |
|------------------------------------|-------------|
| Discharge medication (n = 5936)    |             |
| Aspirin                            | 5857 (98.7) |
| Clopidogrel                        | 4681 (78.9) |
| Ticagrelor                         | 542 ( 9.1)  |
| Prasugrel                          | 703 (11.8)  |
| Potent P2Y <sub>12</sub> inhibitor | 1244 (21.0) |
| Dual antiplatelet therapy          | 5848 (98.5) |
| Statin                             | 5590 (94.2) |
| Beta-blocker                       | 5128 (86.4) |
| Renin-angiotensin system inhibitor | 4467 (75.3) |
| Medication at 1 year (n = 5397)    |             |
| Dual antiplatelet therapy          | 3379 (66.5) |
| Statin                             | 4571 (84.7) |
| Beta-blocker                       | 3846 (71.3) |
| Renin-angiotensin system inhibitor | 3513 (65.1) |

Data are shown as number (percent)

**Supplementary Table S2.** Clinical outcomes according to patient age and time periods after percutaneous coronary intervention

| Outcomes                            | 0–1 year        | 1–7 years       | 1–2 years     | 2–3 years     | 3–4 years     | 4–5 years     | 5–6 years    | 6–7 years    |
|-------------------------------------|-----------------|-----------------|---------------|---------------|---------------|---------------|--------------|--------------|
| <b>Age &lt;55 years</b>             |                 |                 |               |               |               |               |              |              |
| Major adverse cardiovascular event* | 112/1640 (7.0)  | 170/1450 (18.3) | 56/1450 (4.0) | 29/1347 (2.2) | 24/1268 (2.2) | 28/977 (3.4)  | 17/643 (3.4) | 10/375 (3.8) |
| All-cause death                     | 31/1640 (1.9)   | 42/1530 (4.4)   | 11/1530 (0.7) | 9/1471 (0.6)  | 9/1410 (0.8)  | 6/1107 (0.6)  | 5/753 (0.8)  | 2/447 (0.9)  |
| Cardiovascular death                | 29/1640 (1.8)   | 36/1530 (3.5)   | 10/1530 (0.7) | 8/1471 (0.6)  | 8/1410 (0.6)  | 5/1107 (0.5)  | 4/753 (0.6)  | 1/447 (0.5)  |
| Non-fatal myocardial infarction     | 23/1640 (1.5)   | 41/1509 (4.5)   | 11/1509 (0.8) | 4/1441 (0.3)  | 5/1379 (0.4)  | 10/1079 (1.1) | 10/729 (1.8) | 1/429 (0.3)  |
| Non-fatal ischemic stroke           | 9/1640 (0.6)    | 12/1522 (1.5)   | 4/1522 (0.2)  | 0/1459 (0)    | 3/1398 (0.3)  | 2/1096 (0.2)  | 0/742 (0)    | 3/440 (0.9)  |
| Any revascularization               | 70/1640 (4.5)   | 121/1463 (12.6) | 47/1463 (3.3) | 20/1363 (1.5) | 13/1286 (1.1) | 23/994 (2.8)  | 12/654 (2.4) | 6/383 (2.2)  |
| Stent thrombosis <sup>†</sup>       | 13/1640 (0.8)   | 9/1522 (1.1)    | 1/1522 (0.1)  | 2/1463 (0.1)  | 1/1401 (0.1)  | 3/1100 (0.3)  | 1/749 (0.2)  | 1/446 (0.3)  |
| BARC 2, 3, and 5 bleeding           | 61/1640 (3.8)   | 45/1475 (4.5)   | 13/1475 (0.9) | 5/1405 (0.3)  | 12/1345 (1.0) | 10/1057 (1.1) | 3/723 (0.5)  | 2/429 (0.8)  |
| <b>Age 55–64 years</b>              |                 |                 |               |               |               |               |              |              |
| Major adverse cardiovascular event* | 175/1514 (11.8) | 205/1268 (24.3) | 69/1268 (5.6) | 39/1174 (3.4) | 38/1092 (4)   | 33/787 (4.8)  | 14/555 (3.3) | 12/320 (6.0) |
| All-cause death                     | 80/1514 (5.3)   | 90/1367 (11.6)  | 23/1367 (1.7) | 18/1319 (1.3) | 16/1260 (1.5) | 12/934 (1.5)  | 11/668 (2.3) | 10/383 (3.8) |
| Cardiovascular death                | 72/1514 (4.8)   | 69/1367 (9.0)   | 20/1367 (1.5) | 14/1319 (1.0) | 12/1260 (1.2) | 8/934 (1.0)   | 7/668 (1.5)  | 8/383 (3.1)  |
| Non-fatal myocardial infarction     | 19/1514 (1.3)   | 33/1350 (3.6)   | 10/1350 (0.8) | 8/1294 (0.6)  | 6/1229 (0.5)  | 6/904 (0.7)   | 1/645 (0.2)  | 2/370 (0.9)  |
| Non-fatal ischemic stroke           | 17/1514 (1.2)   | 19/1350 (2.3)   | 4/1350 (0.3)  | 2/1300 (0.1)  | 5/1239 (0.5)  | 3/916 (0.3)   | 5/657 (1.0)  | 0/377 (0)    |
| Any revascularization               | 81/1514 (5.7)   | 133/1291 (15.0) | 49/1291 (3.9) | 24/1199 (2.0) | 27/1120 (2.8) | 22/809 (3.2)  | 4/571 (0.9)  | 7/327 (3.4)  |
| Stent thrombosis <sup>†</sup>       | 11/1514 (0.7)   | 6/1359 (0.6)    | 2/1359 (0.1)  | 0/1310 (0)    | 2/1251 (0.2)  | 2/925 (0.2)   | 0/663 (0)    | 0/379 (0)    |
| BARC 2, 3, and 5 bleeding           | 81/1514 (5.6)   | 55/1297 (5.7)   | 26/1297 (2.0) | 11/1231 (0.9) | 9/1165 (0.8)  | 6/873 (0.8)   | 1/628 (0.3)  | 2/363 (1.0)  |
| <b>Age 65–74 years</b>              |                 |                 |               |               |               |               |              |              |
| Major adverse cardiovascular event* | 249/1688 (15.1) | 257/1354 (27.9) | 93/1354 (7.0) | 47/1205 (4.0) | 49/1091 (5.1) | 37/798 (5.4)  | 23/523 (5.5) | 8/265 (4.8)  |
| All-cause death                     | 182/1688 (10.9) | 223/1448 (22.9) | 59/1448 (4.1) | 47/1355 (3.5) | 40/1251 (3.6) | 45/941 (5.7)  | 24/626 (4.7) | 8/322 (3.7)  |
| Cardiovascular death                | 148/1688 (8.9)  | 150/1448 (16.5) | 35/1448 (2.5) | 34/1355 (2.5) | 28/1251 (2.6) | 29/941 (3.6)  | 18/626 (3.6) | 6/322 (2.9)  |
| Non-fatal myocardial infarction     | 29/1688 (1.9)   | 33/1421 (3.9)   | 14/1421 (1.0) | 3/1316 (0.2)  | 8/1210 (0.8)  | 3/903 (0.3)   | 4/604 (0.9)  | 1/311 (0.6)  |

|                               |                |                 |               |               |               |              |             |             |
|-------------------------------|----------------|-----------------|---------------|---------------|---------------|--------------|-------------|-------------|
| Non-fatal ischemic stroke     | 15/1688 (1.0)  | 24/1436 (2.3)   | 5/1436 (0.3)  | 6/1339 (0.5)  | 8/1231 (0.7)  | 4/922 (0.5)  | 1/609 (0.2) | 0/309 (0)   |
| Any revascularization         | 83/1688 (5.5)  | 117/1374 (12.3) | 60/1374 (4.5) | 15/1230 (1.3) | 18/1117 (1.8) | 13/820 (1.8) | 8/537 (1.8) | 3/276 (1.7) |
| Stent thrombosis <sup>†</sup> | 20/1688 (1.2)  | 5/1435 (0.6)    | 0/1435 (0)    | 0/1342 (0)    | 2/1239 (0.2)  | 3/930 (0.4)  | 0/618 (0)   | 0/318 (0)   |
| BARC 2, 3, and 5 bleeding     | 131/1688 (8.2) | 55/1349 (6.8)   | 19/1349 (1.4) | 12/1247 (1.0) | 6/1147 (0.6)  | 9/863 (1.2)  | 7/580 (1.9) | 2/296 (0.8) |

#### Age ≥75 years

|                                     |                 |                 |               |              |               |               |               |               |
|-------------------------------------|-----------------|-----------------|---------------|--------------|---------------|---------------|---------------|---------------|
| Major adverse cardiovascular event* | 326/1400 (23.9) | 302/989 (55.5)  | 83/989 (8.6)  | 62/854 (7.5) | 70/729 (11.3) | 42/474 (11.1) | 24/275 (11.8) | 21/132 (24.3) |
| All-cause death                     | 300/1400 (21.7) | 329/1052 (54.2) | 88/1052 (8.5) | 72/937 (7.8) | 75/815 (10.5) | 38/548 (8.7)  | 30/329 (11.9) | 26/160 (24.6) |
| Cardiovascular death                | 258/1400 (18.9) | 239/1052 (45.2) | 58/1052 (5.7) | 51/937 (5.7) | 58/815 (8.4)  | 27/548 (6.2)  | 24/329 (9.8)  | 21/160 (20.6) |
| Non-fatal myocardial infarction     | 21/1400 (1.7)   | 23/1037 (4.0)   | 5/1037 (0.5)  | 6/920 (0.7)  | 2/796 (0.3)   | 9/534 (2.1)   | 1/317 (0.4)   | 0/154 (0)     |
| Non-fatal ischemic stroke           | 25/1400 (2.0)   | 25/1031 (4.4)   | 7/1031 (0.8)  | 5/915 (0.6)  | 5/792 (0.7)   | 6/531 (1.4)   | 2/316 (1.0)   | 0/151 (0)     |
| Any revascularization               | 46/1400 (4.0)   | 62/1012 (10.6)  | 23/1012 (2.3) | 11/881 (1.3) | 12/757 (2.0)  | 14/495 (3.7)  | 1/289 (0.4)   | 1/141 (1.3)   |
| Stent thrombosis <sup>†</sup>       | 14/1400 (1.1)   | 9/1047 (1.3)    | 3/1047 (0.3)  | 3/932 (0.3)  | 1/809 (0.2)   | 2/543 (0.5)   | 0/323 (0)     | 0/156 (0)     |
| BARC 2, 3, and 5 bleeding           | 133/1400 (10.5) | 70/964 (12.1)   | 28/964 (3.0)  | 15/843 (1.8) | 15/727 (2.4)  | 4/491 (1.0)   | 7/292 (3.1)   | 1/143 (1.2)   |

---

Data are shown as event number/number at risk (Kaplan-Meier estimates)

Abbreviation: BARC, Bleeding Academic Research Consortium

\*A composite of cardiovascular death, non-fatal myocardial infarction, non-fatal ischemic stroke, and any revascularization

<sup>†</sup>Definite or probable stent thrombosis

**Supplementary Table S3.** Univariate Cox regression analysis of factors associated with major adverse cardiovascular events and all-cause death more than 1 year after percutaneous coronary intervention

| Variables                                   | Major adverse cardiovascular event |                | Variables                                   | All-cause death        |                |
|---------------------------------------------|------------------------------------|----------------|---------------------------------------------|------------------------|----------------|
|                                             | Unadjusted HR (95% CI)             | <i>P</i> value |                                             | Unadjusted HR (95% CI) | <i>P</i> value |
| Age, years                                  |                                    |                | Age, years                                  |                        |                |
| <55                                         | 1                                  |                | <55                                         | 1                      |                |
| 55–64                                       | 1.48 (1.20–1.81)                   | < 0.001        | 55–64                                       | 2.45 (1.70–3.54)       | < 0.001        |
| 65–74                                       | 1.86 (1.53–2.26)                   | < 0.001        | 65–74                                       | 6.18 (4.44–8.59)       | < 0.001        |
| ≥75                                         | 3.40 (2.81–4.11)                   | < 0.001        | ≥75                                         | 14.8 (10.7–20.4)       | < 0.001        |
| Male sex                                    | 0.74 (0.64–0.85)                   | < 0.001        | Male sex                                    | 0.65 (0.55–0.76)       | < 0.001        |
| Body mass index ≥25 kg/m <sup>2</sup>       | 0.80 (0.07–0.92)                   | 0.001          | Body mass index ≥25 kg/m <sup>2</sup>       | 0.59 (0.50–0.70)       | < 0.001        |
| Hypertension                                | 1.65 (1.44–1.88)                   | < 0.001        | Hypertension                                | 1.90 (1.62–2.22)       | < 0.001        |
| Diabetes mellitus                           | 1.62 (1.42–1.85)                   | < 0.001        | Diabetes mellitus                           | 1.98 (1.70–2.30)       | < 0.001        |
| Dyslipidemia                                | 0.93 (0.79–1.10)                   | 0.399          | Dyslipidemia                                | 0.66 (0.53–0.82)       | < 0.001        |
| Current smoker                              | 0.73 (0.64–0.83)                   | < 0.001        | Current smoker                              | 0.48 (0.40–0.57)       | < 0.001        |
| Family history of coronary artery disease   | 0.74 (0.48–1.14)                   | 0.171          | Family history of coronary artery disease   | 0.32 (0.15–0.67)       | 0.002          |
| Previous myocardial infarction              | 1.86 (1.40–2.47)                   | < 0.001        | Previous myocardial infarction              | 2.07 (1.51–2.85)       | < 0.001        |
| Previous percutaneous coronary intervention | 1.72 (1.37–2.15)                   | < 0.001        | Previous percutaneous coronary intervention | 1.91 (1.49–2.45)       | < 0.001        |
| Previous coronary artery bypass graft       | 3.14 (1.57–6.30)                   | 0.001          | Previous coronary artery bypass graft       | 3.85 (1.83–8.10)       | < 0.001        |
| Previous cerebrovascular accident           | 1.60 (1.29–1.99)                   | < 0.001        | Previous cerebrovascular accident           | 2.43 (1.96–3.02)       | < 0.001        |
| Atrial fibrillation                         | 1.76 (1.34–2.31)                   | < 0.001        | Atrial fibrillation                         | 2.23 (1.67–2.98)       | < 0.001        |
| Clinical presentation (NSTEMI)              | 1.23 (1.08–1.40)                   | 0.002          | Clinical presentation (NSTEMI)              | 1.42 (1.22–1.65)       | < 0.001        |
| Killip classification III–IV                | 1.75 (1.48–2.08)                   | < 0.001        | Killip classification III ~ IV              | 2.36 (1.97–2.82)       | < 0.001        |

|                                                             |                  |         |                                                             |                  |         |
|-------------------------------------------------------------|------------------|---------|-------------------------------------------------------------|------------------|---------|
| Left ventricular ejection fraction <40%                     | 2.11 (1.77–2.52) | < 0.001 | Left ventricular ejection fraction <40%                     | 3.05 (2.54–3.67) | < 0.001 |
| Anemia                                                      | 1.83 (1.60–2.09) | < 0.001 | Anemia                                                      | 2.67 (2.30–3.11) | < 0.001 |
| Renal insufficiency                                         | 2.57 (2.25–2.93) | < 0.001 | Renal insufficiency                                         | 4.58 (3.94–5.32) | < 0.001 |
| Multivessel coronary artery disease                         | 1.67 (1.46–1.90) | < 0.001 | Multivessel coronary artery disease                         | 1.55 (1.33–1.81) | < 0.001 |
| Left anterior descending artery or left main culprit vessel | 0.96 (0.85–1.09) | 0.556   | Left anterior descending artery or left main culprit vessel | 1.10 (0.94–1.27) | 0.229   |
| Number of coronary arteries treated $\geq 2$                | 1.09 (0.95–1.26) | 0.199   | Number of coronary arteries treated $\geq 2$                | 1.07 (0.91–1.25) | 0.43    |
| Total stent number $\geq 3$                                 | 1.07 (0.89–1.28) | 0.46    | Total stent number $\geq 3$                                 | 1.02 (0.82–1.25) | 0.884   |
| Mean stent diameter <3 mm                                   | 1.42 (1.24–1.62) | < 0.001 | Mean stent diameter <3 mm                                   | 1.46 (1.25–1.71) | < 0.001 |
| Total stent length >60 mm                                   | 1.07 (0.87–1.32) | 0.494   | Total stent length >60 mm                                   | 1.01 (0.79–1.29) | 0.931   |
| Uncontrolled systolic blood pressure                        | 1.75 (1.48–2.07) | < 0.001 | Uncontrolled systolic blood pressure                        | 2.83 (2.36–3.38) | < 0.001 |
| Uncontrolled LDL-cholesterol                                | 1.39 (1.18–1.64) | < 0.001 | Uncontrolled LDL-cholesterol                                | 1.23 (0.97–1.55) | 0.081   |

---

**Supplementary Table S4.** Adjusted hazard ratios of factors associated with major adverse cardiovascular events and all-cause death more than 1 year after percutaneous coronary intervention according to patient age

| Variables                                  | Age <65 years         |         | Variables                                  | Age ≥65 years         |         |
|--------------------------------------------|-----------------------|---------|--------------------------------------------|-----------------------|---------|
|                                            | Adjusted* HR (95% CI) | P value |                                            | Adjusted* HR (95% CI) | P value |
| <b>Major adverse cardiovascular events</b> |                       |         | <b>Major adverse cardiovascular events</b> |                       |         |
| Renal insufficiency                        | 2.10 (1.49–2.95)      | < 0.001 | Uncontrolled systolic blood pressure       | 1.57 (1.19–2.07)      | 0.001   |
| Multivessel coronary artery disease        | 1.90 (1.41–2.56)      | < 0.001 | Age ≥75 year old <sup>†</sup>              | 1.46 (1.16–1.84)      | 0.001   |
| Anemia                                     | 1.50 (1.12–2.00)      | 0.006   | Left ventricular ejection fraction <40%    | 1.55 (1.15–2.09)      | 0.004   |
| Uncontrolled LDL-cholesterol               | 1.39 (1.08–1.79)      | 0.010   | Uncontrolled LDL-cholesterol               | 1.37 (1.09–1.73)      | 0.008   |
|                                            |                       |         | Killip classification III ~ IV             | 1.36 (1.03–1.80)      | 0.030   |
|                                            |                       |         | Multivessel coronary artery disease        | 1.38 (1.05–1.81)      | 0.021   |
| <b>All-cause death</b>                     |                       |         | <b>All-cause death</b>                     |                       |         |
| Uncontrolled systolic blood pressure       | 3.31 (2.08–5.28)      | < 0.001 | Uncontrolled systolic blood pressure       | 2.05 (1.52–2.77)      | < 0.001 |
| Left ventricular ejection fraction <40%    | 3.18 (1.99–5.08)      | < 0.001 | Age ≥75 year old <sup>†</sup>              | 1.91 (1.46–2.49)      | <0.001  |
| Diabetes mellitus                          | 2.13 (1.41–3.20)      | < 0.001 | Renal insufficiency                        | 1.84 (1.4–2.43)       | < 0.001 |
| Anemia                                     | 1.83 (1.19–2.82)      | 0.006   | Male sex                                   | 1.82 (1.38–2.42)      | < 0.001 |
| Body mass index ≥25 kg/m <sup>2</sup>      | 0.59 (0.38–0.89)      | 0.013   | Left ventricular ejection fraction <40%    | 1.82 (1.30–2.54)      | < 0.001 |
|                                            |                       |         | Killip classification III–IV               | 1.53 (1.12–2.1)       | 0.008   |
|                                            |                       |         | Uncontrolled LDL-cholesterol               | 1.33 (1.01–1.76)      | 0.044   |

Abbreviations: CI, confidence interval; HR, hazard ratio; LDL, low-density lipoprotein; NSTEMI, non-ST-segment elevation myocardial infarction.

\*Adjusted by all covariates in Table 1 with *P* values <0.1 on univariate analysis

<sup>†</sup>Compared to age 65~74 year old
